# Supplementary material
Source: PubMed Central journal article supplement (PMC5411599)

**Supplementary Figure S1. Loss of *Ccr7* does not impact leukocyte accumulation or T cell priming in the spleen during WNV infection.** (A-F) Following FSC/SSC and UV<sup>-</sup> gating for live cells, total cell numbers of mDC (MHCII<sup>hi</sup>CD11c<sup>+</sup>), CD8<sup>+</sup> T cells (CD3<sup>+</sup>CD8<sup>+</sup>), CD4<sup>+</sup> T cells (CD3<sup>+</sup>CD4<sup>+</sup>), activated CD8<sup>+</sup> T cells (CD3<sup>+</sup>CD8<sup>+</sup>CD44<sup>+</sup>), and activated CD4<sup>+</sup> T cells (CD3<sup>+</sup>CD4<sup>+</sup>CD44<sup>+</sup>) were assessed by flow cytometry on days 0, 1, 3, and 5 p.i. from the spleen of WT and *Ccr7*<sup>-/-</sup> mice. (G) Viral load was assessed from the spleen of WT and *Ccr7*<sup>-/-</sup> mice by an FFU assay. (H) The percentage of CD3<sup>+</sup>CD4<sup>+</sup> T cells expressing IL-17, after stimulation *ex vivo* for 8 hours with an immunodominant Db-restricted WNV NS4B peptide and gating on FSC/SSC and UV<sup>-</sup> for live cells, from the spleen of day 8 WNV-infected WT and *Ccr7*<sup>-/-</sup> mice was assessed by flow cytometry. (K) The total number of Treg cells from the spleen of day 8 WNV-infected WT and *Ccr7*<sup>-/-</sup> mice is shown and were gated on FSC/SSC, UV<sup>-</sup> for live cells, CD3<sup>+</sup>CD4<sup>+</sup>, and FoxP3<sup>+</sup>CD25<sup>+</sup> by flow cytometry analysis. (I-J and L) Splenocytes from day 8 WNV-infected WT and *Ccr7*<sup>-/-</sup> mice were stimulated *ex vivo* for 8 hours with an immunodominant D<sup>b</sup>-restricted WNV NS4B peptide and intracellular cytokine expression of IFN- $\gamma$  and/or TNF- $\alpha$  was assessed by flow cytometry analysis with the dot plots, percentages, and total numbers shown. Gating strategy: FSC/SSC UV<sup>-</sup>CD3<sup>+</sup>CD8<sup>+</sup> followed by IFN- $\gamma$  and/or TNF- $\alpha$  expression. Data are shown as mean  $\pm$ SD for n=3-9 mice per genotype and time point from two independent experiments.

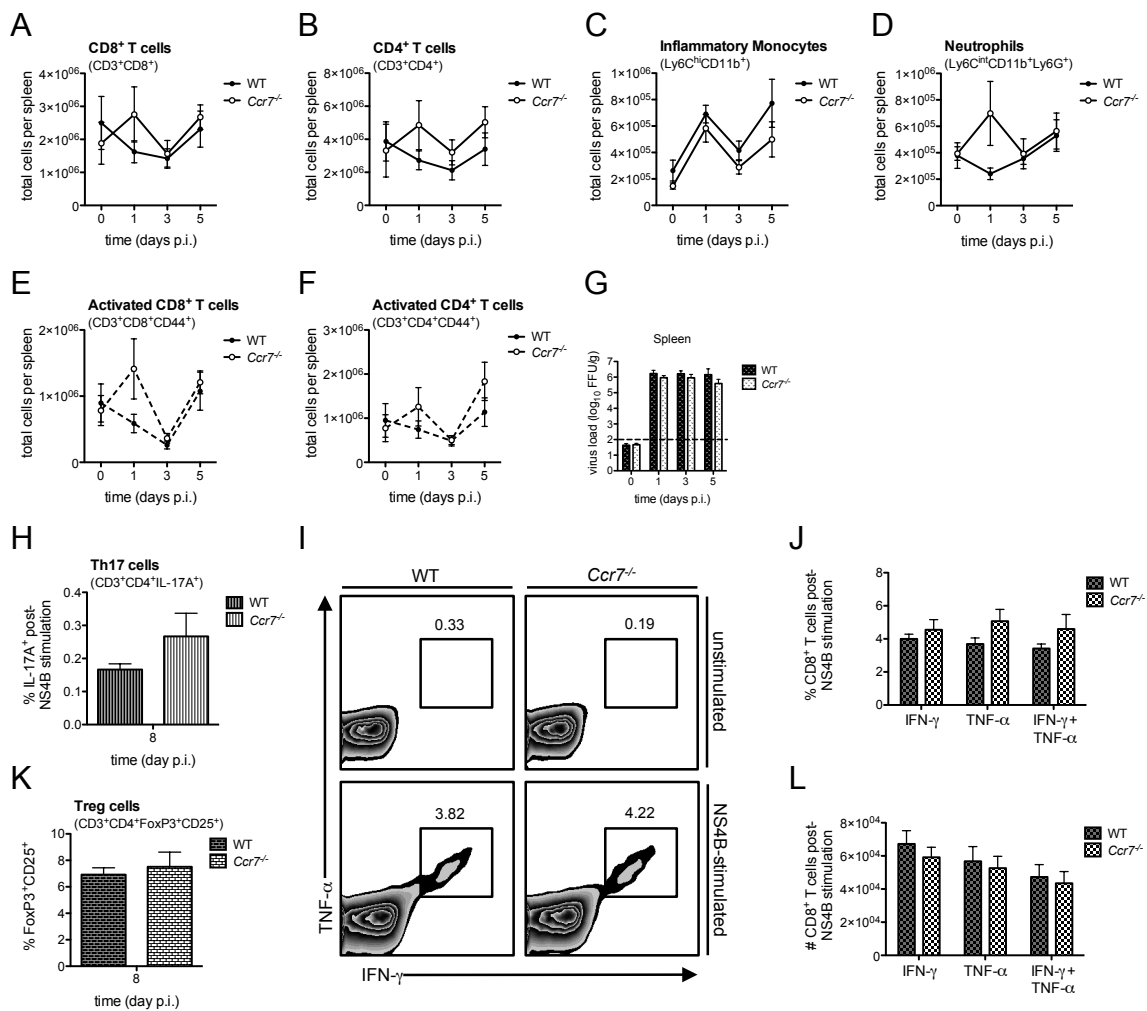

**Supplementary Figure S2. Cytokines are elevated in the CNS of *Ccr7*-deficient mice. (A-H)** Protein levels of IL-1 $\beta$ , IL-12, IL-22, Ccl3, Ccl4, Ccl5, Ccl2, and Ccl7 in the CNS of WT and *Ccr7*<sup>-/-</sup> mice at days 0, 8, 10, and 12 p.i. were measured by multiplex ELISA. Data are shown as mean  $\pm$ SD for n=3-9 mice per genotype and time point from two independent experiments. \*, P < 0.05 and \*\*\*, P < 0.001.

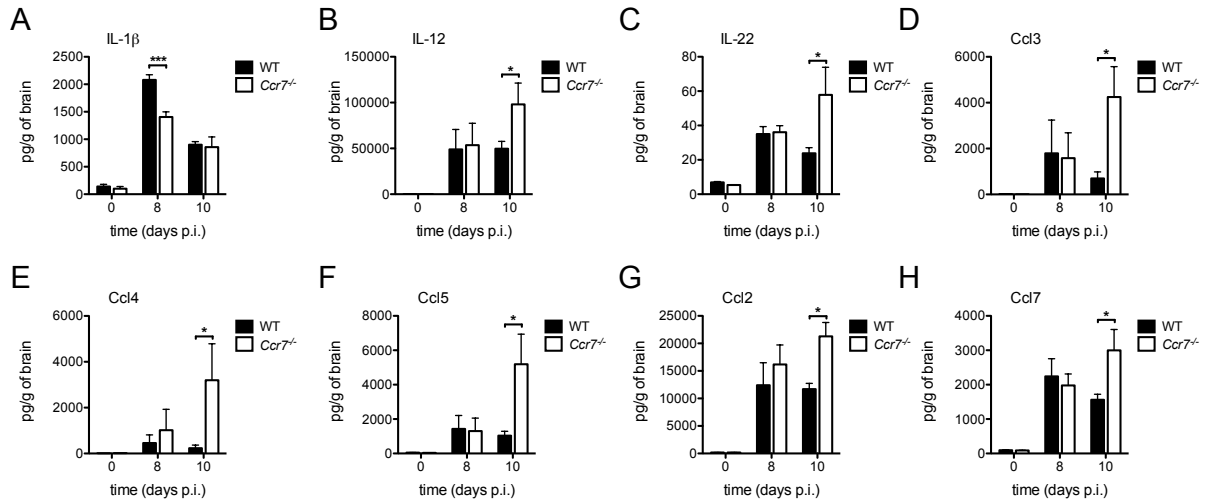

Supplement: JVI.02409-16_zjv999182601s1.pdf [file JVI.02409-16_zjv999182601s1.pdf]
